# Supplementary material for: Connecting the Dots: AfrAbia's Environmental Challenges and Parkinson's Disease
Source: Preprints.org preprint supplement (doi:10.20944/preprints202401.1168.v1), 2024-01-16
Supplement: Supplementary file 2 [file supplementary]

**Appendix**

**Supplementary AfrAbia+plus Parkinson Disease Genomic Consortium (AA-PD-GC) members based on the country**

| **Country** | **Member** |
| --- | --- |
| **Egypt** | **Wael Mohamed, MD, PhD**  Kulliyah of Medicine, International Islamic University Malaysia, Kuantan, Pahang, Malaysia |
| **Mohamed Abdelhalim Eltantawi, MD**  Delta University for Science and Technology, Egypt. [Mohammed.tantawy@deltauniv.edu.eg](mailto:Mohammed.tantawy@deltauniv.edu.eg) |
| **Walaa A. Kamel, MD**  Department of Neurology, Beni-Suef University, Egypt. [walaaneuro@yahoo.com](mailto:walaaneuro@yahoo.com) |
| **Eman Eltantawy, MD**  Assistant lecturer of Neurology Faculty of Medicine, Mansoura University, Egypt. [Emantantawy1989@hotmail.com](mailto:Emantantawy1989@hotmail.com) |
| **ElSayed Heiba, MD**  Neurology fellow Mansoura international hospital, Egypt [sayedelhussieni@gmail.com](mailto:sayedelhussieni@gmail.com) |
| **Nehal Abou Bakr Elbeltagy, MD**  Neurology specialist Mansoura international hospital, Egypt [nehalelbeltagy92@yahoo.com](mailto:nehalelbeltagy92@yahoo.com) |
| **Ahmed Abdellatif Mousa, MD**  Lecturer of Neurology, Faculty of Medicine Delta university for science and technology, Gamasa, Egypt [ahmed.abdulatif@deltauniv.edu.eg](mailto:ahmed.abdulatif@deltauniv.edu.eg) |
| **Shady Khalil El Rashedy, MD**  Lecturer of Neurology, Faculty of Medicine Delta university for science and technology, Gamasa, Egypt [Shady.elrashedy@deltauniv.edu.eg](mailto:Shady.elrashedy@deltauniv.edu.eg) |
| **Ethiopia** | **Yared Zenebe Zewde, MD**  Department of Neurology , School of Medicine, College of Health Sciences, Addis Ababa University, Ethiopia.  [yaredzene121@gmail.com](mailto:yaredzene121@gmail.com)  **Seblewongel Asmare, MD**  Department of Neurology , School of Medicine, College of Health Sciences,  Addis Ababa University, Ethiopia. [sebleasmare21@gmail.com](mailto:sebleasmare21@gmail.com) |
| **Tunisia** | **Samia Ben Sassi, MD**  National Institute Mongi Ben Hmida of Neurology, Tunis, Tunisia. [dr.samiabensassi@gmail.com](mailto:dr.samiabensassi@gmail.com) |
|  | **Rim Amouri,** PhD  Molecular Neurobiology Laboratory. National Institute Mongi Ben Hmida of Neurology, Tunis, Tunisia.  [rim.amouri@gmail.com](mailto:rim.amouri@gmail.com) |
|  | **Fatma Nabli, MD**  Neurology department. National Institute Mongi Ben Hmida of Neurology, Tunis, Tunisia.  fatmafatnassi@gmail.com |
|  | **Zakaria Saied, MD**  Neurology department.National Institute Mongi Ben Hmida of Neurology, Tunis, Tunisia.  [zakaria.saied@fmt.utm.tn](mailto:zakaria.saied@fmt.utm.tn#search/zakaria+/_blank) |
|  | **Rania Zouari, MD**  Neurology department.National Institute Mongi Ben Hmida of Neurology, Tunis, Tunisia.  zouari.rania12@gmail.com |
|  | **Amine Rachdi, MD**  Neurology department.National Institute Mongi Ben Hmida of Neurology, Tunis, Tunisia  dr.rachdi.amine@gmail.com |
|  | **Dina Ben Mohamed, MD**  Neurology department.National Institute Mongi Ben Hmida of Neurology, Tunis, Tunisia  [dinamedicale@gmail.com](mailto:dinamedicale@gmail.com) |
|  | **Jihene Ketata, MD**  Neurology department.National Institute Mongi Ben Hmida of Neurology, Tunis, Tunisia  jiheneketata@gmail.com |
| **Algeria** | **Yasser Mecheri, MD**  Neurology department, Benbadis University Hospital, Constantine 25000, Algeria  [mecheriyasser@outlook.com](mailto:mecheriyasser@outlook.com)  **Boubekeur Saddik Fekraoui, MD**  Neurology Department, Dr Benbadis University Hospital, Constantine 25018,  Algeria  [as71fekraoui@gmail.com](mailto:as71fekraoui@gmail.com)  **Fatima Serradj, MD**  Neurology Department, Dr Benbadis University Hospital, Constantine 25018,  Algeria  [fatser98@gmail.com](mailto:fatser98@gmail.com)  **Imene Lemdaoui, MD**  Neurology Department, Dr Benbadis University Hospital, Constantine 25018,  Algeria  [ilemdaoui25@gmail.com](mailto:ilemdaoui25@gmail.com) |
| **Morocco** | **Najib Kissani, MD**  Neurology Department, University Hospital Mohamed VI, Marrakech, Morocco [najibkis@gmail.com](mailto:najibkis@gmail.com)  Neuroscience Research Laboratory, Faculty of Medicine and Pharmacy, Cadi Ayyad University, Marrakech,  Morocco. |
| **Moohamed Chraa, MD**  Neurology Department, University Hospital Mohamed VI, Marrakech, Morocco  [medchraa@gmail.com](mailto:medchraa@gmail.com) |
| **Saudi Arabia** | **Bashayer R Al-Mubarak, PhD**  King Faisal Specialist Hospital and Research Center, Riyadh, Saudi Arabia.  [bal-mubarak@kfshrc.edu.sa](mailto:bal-mubarak@kfshrc.edu.sa) |
| **Badrah S Alghamdi, PhD**  King Abdulaziz University, Jeddah, Saudi Arabia. [basalghamdi@kau.edu.sa](mailto:basalghamdi@kau.edu.sa) |
| **Jordan**  **&**  **UAE** | **Karem H. Alzoubi, PhD**  Department of Pharmacy Practice and Pharmacotherapeutics, College of Pharmacy, University of Sharjah, Sharjah, UAE [kelzubi@sharjah.ac.ae](mailto:kelzubi@sharjah.ac.ae)  Department of Clinical Pharmacy, Faculty of Pharmacy, Jordan University of Science and Technology, Irbid, Jordan |
